# Supplementary material for: The Effectiveness of Cognitive Behavioural Treatment for Non-Specific Low Back Pain: A Systematic Review and Meta-Analysis
Source: PubMed Central journal article supplement (PMC4526658; doi:10.1371/journal.pone.0134192), 2015-08-05
Supplement: pone.0134192.s001.pdf [file pone.0134192.s001.pdf]

| trialid           | riskofbias        | LBP_duration | assessmentpoint_weeks    | timeperiod | cb_code      | cb_mean      | cb_sd       | cb_n |
|-------------------|-------------------|--------------|--------------------------|------------|--------------|--------------|-------------|------|
| Abbasi 2012       | High risk of bias | >=6 weeks    | 59 weeks                 | LT         | CB alone     | 8.515789474  | 5.6702      | 19   |
| Abbasi 2012       | High risk of bias | >=6 weeks    | 7 weeks                  | ST         | CB alone     | 6.028571429  | 3.8727      | 21   |
| Basler 1997       | High risk of bias | >=6 weeks    | 12 weeks                 | ST         | CB alone     | 1.63         | 0.87        | 36   |
| Buhrman 2004      | High risk of bias | >=6 weeks    | 6 weeks                  | ST         | CB alone     | 3.2          | 1.4         | 22   |
| Buhrman 2011      | High risk of bias | >=6 weeks    | 12 weeks?? 9 weeks       | ST         | CB alone     | 3.2          | 1.4         | 23   |
| Carpenter 2012    | High risk of bias | >=6 weeks    | 3 weeks (end of program) | ST         | CB alone     | 13.5         | 5.8         | 63   |
| Johnson 2007      | High risk of bias | >=6 weeks    | 65 weeks                 | LT         | CB alone     | 6.7          | 5.6         | 101  |
| Johnson 2007      | High risk of bias | >=6 weeks    | 12 weeks                 | ST         | CB alone     | 7.4          | 5.3         | 110  |
| Moore 2000        | High risk of bias | >=6 weeks    | 52 weeks                 | LT         | CB alone     | 4.84         | 6.01        | 97   |
| Moore 2000        | High risk of bias | >=6 weeks    | 12 weeks                 | ST         | CB alone     | 5.39         | 5.76        | 108  |
| Smeets 2006       | Low risk of bias  | >=6 weeks    | 10 weeks                 | ST         | CB alone     | -2.65        | 4.66        | 55   |
| Altmaier 1992     | High risk of bias | >=6 weeks    | 3 weeks                  | ST         | CB + Control | 57.43        | 15.06       | 24   |
| Altmaier 1992     | High risk of bias | >=6 weeks    | 29 weeks                 | LT         | CB + Control | 52.19        | 19.58       | 24   |
| Christiansen 2010 | High risk of bias | >=6 weeks    | 3 weeks                  | ST         | CB + Control | 69.6         | 13.4        | 30   |
| Schweikert 2006   | High risk of bias | >=6 weeks    | 3 weeks (discharge)      | ST         | CB + Control | 2.8          | 12.3        | 169  |
| Smeets 2006       | Low risk of bias  | >=6 weeks    | 10 weeks                 | ST         | CB + Control | -2.27        | 4.19        | 55   |
| Smeets 2008       | Low risk of bias  | >=6 weeks    | 62 weeks                 | LT         | CB + Control | -2.438285714 | 4.442429909 | 105  |
| Critchley 2007    | Low risk of bias  | >=6 weeks    | 52 weeks                 | LT         | CB alone     | 5.8          | 6.780917439 | 69   |
| Fersum 2013       | High risk of bias | >=6 weeks    | 12 weeks                 | ST         | CB alone     | 7.6          | 6.7         | 51   |
| Fersum 2013       | High risk of bias | >=6 weeks    | 64 weeks                 | LT         | CB alone     | 9.9          | 9.8         | 51   |
| Hill 2011         | Low risk of bias  | >=6 weeks    | 52 weeks                 | LT         | CB + Control | 5.9          | 7.2         | 128  |
| Lamb 2012         | Low risk of bias  | >=6 weeks    | 12 weeks                 | ST         | CB + Control | 6.5          | 5.27        | 335  |
| Lamb 2012         | Low risk of bias  | >=6 weeks    | 52 weeks                 | LT         | CB + Control | 6.1          | 5.62        | 339  |
| Monticone 2013    | High risk of bias | >=6 weeks    | 5 weeks                  | ST         | CB + Control | 5.04         | 2.04        | 45   |
| Monticone 2013    | High risk of bias | >=6 weeks    | 57 weeks                 | LT         | CB + Control | 1.31         | 1.59        | 45   |

| control_code | control_mean | control_sd  | control_n | outcome    | measure                                                   | measuremax |
|--------------|--------------|-------------|-----------|------------|-----------------------------------------------------------|------------|
| WL/UC        | 10.4         | 6.2         | 10        | disability | RDQ                                                       | 24         |
| WL/UC        | 3.2          | 3.2         | 11        | disability | RDQ                                                       | 24         |
| WL/UC        | 1.84         | 0.62        | 40        | disability | Dusseldorf Disability Scale - physical functions subscale | 5          |
| WL/UC        | 3.5          | 1.2         | 29        | disability | MPI - interference subscale                               | 6          |
| WL/UC        | 3.5          | 1.2         | 27        | disability | MPI - interference subscale                               | 6          |
| WL/UC        | 16.3         | 5.2         | 68        | disability | RMDQ                                                      | 24         |
| WL/UC        | 8            | 5.5         | 94        | disability | RMDQ                                                      | 24         |
| WL/UC        | 8            | 5.3         | 113       | disability | RMDQ                                                      | 24         |
| WL/UC        | 5.56         | 5.8         | 95        | disability | RMDQ                                                      | 24         |
| WL/UC        | 6.55         | 6.15        | 105       | disability | RMDQ                                                      | 24         |
| WL/UC        | 0.04         | 2.9         | 50        | disability | RMDQ                                                      | 24         |
| GAT          | 57.67        | 16.37       | 21        | disability | MPI - interference subscale                               | 30         |
| GAT          | 50.71        | 25.95       | 21        | disability | MPI - interference subscale                               | 30         |
| GAT          | 70.6         | 17.1        | 30        | disability | HannoverADL                                               | 100        |
| GAT          | 3.5          | 13.4        | 194       | disability | Hanover Functional questionnaire                          | 100        |
| GAT          | -2.25        | 4.51        | 52        | disability | RMDQ                                                      | 24         |
| GAT          | -3.2         | 4.81        | 51        | disability | RMDQ                                                      | 24         |
| GAT          | 7.848251748  | 7.115221223 | 143       | disability | RMDQ                                                      | 24         |
| GAT          | 18.5         | 8.1         | 43        | disability | ODI                                                       | 100        |
| GAT          | 19.7         | 11.7        | 43        | disability | ODI                                                       | 100        |
| GAT          | 4.8          | 6.3         | 56        | disability | RMDQ                                                      | 24         |
| GAT          | 7.3          | 5.28        | 179       | disability | RDQ                                                       | 24         |
| GAT          | 6.9          | 5.12        | 159       | disability | RDQ                                                       | 24         |
| GAT          | 11.04        | 2.27        | 45        | disability | RMDQ                                                      | 24         |
| GAT          | 11           | 2           | 45        | disability | RMDQ                                                      | 24         |

| higherisgood | cb_meanadj   | control_meanadj | control_class | samplesize | SMD_disability_ST | seSMD_disability_ST | SMD_disability_LT |
|--------------|--------------|-----------------|---------------|------------|-------------------|---------------------|-------------------|
| No           | 8.515789032  | 10.39999962     | UC            | 29         |                   |                     | -0.321969956      |
| No           | 6.028571606  | 3.200000048     | UC            | 32         | 0.772364855       | 0.385318816         |                   |
| No           | 1.629999995  | 1.840000033     | UC            | 76         | -0.280478537      | 0.230888113         |                   |
| No           | 3.200000048  | 3.5             | WL            | 51         | -0.23264499       | 0.283706874         |                   |
| No           | 3.200000048  | 3.5             | WL            | 50         | -0.231569886      | 0.284734756         |                   |
| No           | 13.5         | 16.29999924     | WL            | 131        | -0.509410024      | 0.177720875         |                   |
| No           | 6.699999809  | 8               | UC            | 195        |                   |                     | -0.234148279      |
| No           | 7.400000095  | 8               | UC            | 223        | -0.113207527      | 0.13405022          |                   |
| No           | 4.840000153  | 5.559999943     | UC            | 192        |                   |                     | -0.121888459      |
| No           | 5.389999866  | 6.550000191     | UC            | 213        | -0.194780603      | 0.137378946         |                   |
| No           | -2.650000095 | 0.039999999     | WL            | 105        | -0.685792804      | 0.201158851         |                   |
| No           | 57.43000031  | 57.66999817     | GAT           | 45         | -0.015303137      | 0.298811704         |                   |
| No           | 52.18999863  | 50.70999908     | GAT           | 45         |                   |                     | 0.065010361       |
| Yes          | 30.39999962  | 29.39999962     | GAT           | 60         | 0.065096527       | 0.258269608         |                   |
| Yes          | 97.19999695  | 96.5            | GAT           | 363        | 0.054264326       | 0.105241992         |                   |
| No           | -2.269999981 | -2.25           | GAT           | 107        | -0.004599419      | 0.193423599         |                   |
| No           | -2.438285828 | -3.200000048    | GAT           | 156        |                   |                     | 0.166859016       |
| No           | 5.800000191  | 7.84825182      | GAT           | 212        |                   |                     | -0.292243481      |
| No           | 7.599999905  | 18.5            | GAT           | 94         | -1.478530169      | 0.233975157         |                   |
| No           | 9.899999619  | 19.70000076     | GAT           | 94         |                   |                     | -0.915093362      |
| Yes          | 18.10000038  | 19.20000076     | GAT           | 184        |                   |                     | -0.158493772      |
| No           | 6.5          | 7.300000191     | GAT           | 514        | -0.151702553      | 0.092704594         |                   |
| No           | 6.099999905  | 6.900000095     | GAT           | 498        |                   |                     | -0.14636758       |
| No           | 5.039999962  | 11.03999996     | GAT           | 90         | -2.780266762      | 0.297261238         |                   |
| No           | 1.309999943  | 11              | GAT           | 90         |                   |                     | -5.363463879      |

| seSMD_disability_LT | _ES          | _seES       | _LCI         | _UCI         | _WT         |
|---------------------|--------------|-------------|--------------|--------------|-------------|
| 0.393130124         | -0.321969956 | 0.393130124 | -1.092490792 | 0.44855094   | 8.337352753 |
|                     |              |             |              |              | 0           |
|                     |              |             |              |              | 0           |
|                     |              |             |              |              | 0           |
|                     |              |             |              |              | 0           |
|                     |              |             |              |              | 0           |
| 0.143810019         | -0.234148279 | 0.143810019 | -0.516010761 | 0.047714192  | 10.75773335 |
|                     |              |             |              |              | 0           |
| 0.144480765         | -0.121888459 | 0.144480765 | -0.405065536 | 0.161288634  | 10.75322437 |
|                     |              |             |              |              | 0           |
|                     |              |             |              |              | 0           |
|                     |              |             |              |              | 0           |
| 0.298889369         | 0.065010361  | 0.298889369 | -0.520802021 | 0.650822759  | 9.36367321  |
|                     |              |             |              |              | 0           |
|                     |              |             |              |              | 0           |
|                     |              |             |              |              | 0           |
| 0.170944571         | 0.166859016  | 0.170944571 | -0.168186188 | 0.501904249  | 10.5621109  |
| 0.147272229         | -0.292243481 | 0.147272229 | -0.580891728 | -0.003595213 | 10.73427391 |
|                     |              |             |              |              | 0           |
| 0.217749223         | -0.915093362 | 0.217749223 | -1.341874003 | -0.488312751 | 10.16824818 |
| 0.160432711         | -0.158493772 | 0.160432711 | -0.472936094 | 0.155948564  | 10.64103127 |
|                     |              |             |              |              | 0           |
| 0.096232824         | -0.14636758  | 0.096232824 | -0.334980458 | 0.042245295  | 11.03092766 |
|                     |              |             |              |              | 0           |
| 0.455951601         | -5.363463879 | 0.455951601 | -6.25711298  | -4.469815254 | 7.651422977 |
