# Supplementary material for: The Effectiveness of Cognitive Behavioural Treatment for Non-Specific Low Back Pain: A Systematic Review and Meta-Analysis
Source: PubMed Central journal article supplement (PMC4526658; doi:10.1371/journal.pone.0134192), 2015-08-05
Supplement: pone.0134192.s002.pdf [file pone.0134192.s002.pdf]

| trialid           | riskofbias        | LBP_duration | assessmentpoint_weeks | timeperiod | CBcode       | cb_mean      | cb_sd       | cb_n | controlcode |
|-------------------|-------------------|--------------|-----------------------|------------|--------------|--------------|-------------|------|-------------|
| Abbasi 2012       | High risk of bias | >=6 weeks    | 59 weeks              | LT         | CB alone     | 3.273684211  | 2.596037705 | 19   | WL/UC       |
| Abbasi 2012       | High risk of bias | >=6 weeks    | 7 weeks               | ST         | CB alone     | 2.771428571  | 1.918332609 | 21   | WL/UC       |
| Basler 1997       | High risk of bias | >=6 weeks    | 12 weeks              | ST         | CB alone     | 4.08         | 2.11        | 36   | WL/UC       |
| Buhrman 2004      | High risk of bias | >=6 weeks    | 6 weeks               | ST         | CB alone     | 2.4          | 1.1         | 22   | WL/UC       |
| Buhrman 2011      | High risk of bias | >=6 weeks    | 9 weeks               | ST         | CB alone     | 3.15         | 2.2         | 23   | WL/UC       |
| Johnson 2007      | High risk of bias | >=6 weeks    | 12 weeks              | ST         | CB alone     | 29.1         | 24.5        | 110  | WL/UC       |
| Johnson 2007      | High risk of bias | >=6 weeks    | 65 weeks              | LT         | CB alone     | 27.9         | 26.1        | 102  | WL/UC       |
| Moore 2000        | High risk of bias | >=6 weeks    | 52 weeks              | LT         | CB alone     | 2.74         | 2.09        | 97   | WL/UC       |
| Moore 2000        | High risk of bias | >=6 weeks    | 12 weeks              | ST         | CB alone     | 3.69         | 2.05        | 108  | WL/UC       |
| Smeets 2006       | Low risk of bias  | >=6 weeks    | 10 weeks              | ST         | CB alone     | 38.59        | 19.69449983 | 52   | WL/UC       |
| Turner 1988       | Low risk of bias  | >=6 weeks    | 8 weeks               | ST         | CB alone     | 15.91        | 11.63       | 24   | WL/UC       |
| Turner 1993       | High risk of bias | >=6 weeks    | 6 weeks               | ST         | CB alone     | 44.3         | 28.45       | 21   | WL/UC       |
| Altmaier 1992     | High risk of bias | >=6 weeks    | 29 weeks              | LT         | CB + Control | 2.33         | 0.8         | 21   | GAT         |
| Altmaier 1992     | High risk of bias | >=6 weeks    | 3 weeks               | ST         | CB + Control | 2.05         | 0.74        | 21   | GAT         |
| Christiansen 2010 | High risk of bias | >=6 weeks    | 3 weeks               | ST         | CB + Control | 3.7          | 2.1         | 30   | GAT         |
| Schweikert 2006   | High risk of bias | >=6 weeks    | 3 weeks               | ST         | CB + Control | -1.2         | 1.2         | 170  | GAT         |
| Smeets 2006       | Low risk of bias  | >=6 weeks    | 10 weeks              | ST         | CB + Control | 44.67        | 19.25086574 | 51   | GAT         |
| Smeets 2008       | Low risk of bias  | >=6 weeks    | 62 weeks              | LT         | CB + Control | -1.332285714 | 24.17674862 | 105  | GAT         |
| Critchley 2007    | Low risk of bias  | >=6 weeks    | 52 weeks              | LT         | CB alone     | 38           | 36.02       | 69   | GAT         |
| Fersum 2013       | High risk of bias | >=6 weeks    | 64 weeks              | LT         | CB alone     | 2.3          | 2           | 51   | GAT         |
| Fersum 2013       | High risk of bias | >=6 weeks    | 12 weeks              | ST         | CB alone     | 1.7          | 1.7         | 51   | GAT         |
| Gohner 2006       | High risk of bias | <6 weeks     | 33 weeks              | LT         | CB + Control | 1.96         | 1.4         | 25   | GAT         |
| Gohner 2006       | High risk of bias | <6 weeks     | 7 weeks               | ST         | CB + Control | 3.04         | 1.7         | 26   | GAT         |
| Hill 2011         | Low risk of bias  | >=6 weeks    | 52 weeks              | LT         | CB + Control | 3.7          | 2.7         | 128  | GAT         |
| Lamb 2012         | Low risk of bias  | >=6 weeks    | 12 weeks              | ST         | CB + Control | 46.76        | 23.13       | 354  | GAT         |
| Lamb 2012         | Low risk of bias  | >=6 weeks    | 52 weeks              | LT         | CB + Control | 44.5         | 26.04       | 392  | GAT         |
| Monticone 2013    | High risk of bias | >=6 weeks    | 57 weeks              | LT         | CB + Control | 1.38         | 1.07        | 45   | GAT         |
| Monticone 2013    | High risk of bias | >=6 weeks    | 5 weeks               | ST         | CB + Control | 2.69         | 0.97        | 45   | GAT         |
| Nicholas 1991     | High risk of bias | >=6 weeks    | 57 weeks              | LT         | CB + Control | 1.88         | 0.65        | 6    | GAT         |
| Nicholas 1991     | High risk of bias | >=6 weeks    | 5 weeks               | ST         | CB + Control | 1.81         | 0.8         | 7    | GAT         |
| Nicholas 1992     | High risk of bias | >=6 weeks    | 31 weeks              | LT         | CB + Control | 2.89         | 0.64        | 9    | GAT         |
| Nicholas 1992     | High risk of bias | >=6 weeks    | 5 weeks               | ST         | CB + Control | 3.07         | 0.79        | 9    | GAT         |

| control_mean | control_sd  | control_n | measure                                                 | measuremax | higherisgood | cb_meanadj   |
|--------------|-------------|-----------|---------------------------------------------------------|------------|--------------|--------------|
| 4.3          | 1.4         | 10        | 0-10 VAS                                                | 10         | No           | 3.273684263  |
| 3.2          | 1.6         | 11        | 0-10 VAS                                                | 10         | No           | 2.771428585  |
| 4.18         | 1.37        | 40        | 0-10 NRS                                                | 10         | No           | 4.079999924  |
| 3.2          | 0.8         | 29        | Multidimesional Pain Inventory - pain severity subscale | 6          | No           | 2.400000095  |
| 3.35         | 2.6         | 27        | Multidimesional Pain Inventory - pain severity subscale | 6          | No           | 3.150000095  |
| 35.3         | 26.7        | 113       | 100mm VAS                                               | 100        | No           | 29.10000038  |
| 36.4         | 27.3        | 94        | 100mm VAS                                               | 100        | No           | 27.89999962  |
| 2.98         | 1.99        | 95        | 0-10                                                    | 10         | No           | 2.74000001   |
| 4.06         | 2.17        | 105       | 0-10                                                    | 10         | No           | 3.690000057  |
| 53.35        | 22.6        | 50        | VAS                                                     | 100        | No           | 38.59000015  |
| 22.14        | 12.35       | 21        | The McGill Pain Questionnaire Pain Rating Index         |            | No           | 15.90999985  |
| 48.06        | 20.97       | 18        | VAS                                                     | 100        | No           | 44.29999924  |
| 2            | 0.95        | 21        | McGill Question                                         | 5          | No           | 2.329999924  |
| 2            | 0.89        | 21        | McGill Question                                         | 5          | No           | 2.049999952  |
| 4.2          | 2.2         | 30        | NRS                                                     | 10         | No           | 3.700000048  |
| -1.2         | 1.2         | 193       | 6pt likert sale                                         | 6          | No           | -1.200000048 |
| 45.12        | 19.81529605 | 56        | VAS                                                     | 100        | No           | 44.669999817 |
| 2.31         | 24.15697474 | 51        | VAS                                                     | 100        | Yes          | 101.332283   |
| 42           | 30.2        | 143       | 0-100                                                   | 100        | No           | 38           |
| 3.8          | 2.1         | 43        | 0-10 NRS                                                | 10         | No           | 2.299999952  |
| 3.8          | 1.9         | 43        | 0-10 NRS                                                | 10         | No           | 1.700000048  |
| 1.98         | 1.98        | 22        | 0-10 NRS                                                | 10         | No           | 1.960000038  |
| 2.91         | 2.02        | 25        | 0-10 NRS                                                | 10         | No           | 3.039999962  |
| 3.6          | 3.2         | 56        | Unclear                                                 | 10         | Yes          | 6.300000191  |
| 52.9         | 22.74       | 189       | Modified Von Korff                                      | 100        | No           | 46.759999832 |
| 51           | 23.93       | 195       | Modified Von Korff                                      | 100        | No           | 44.5         |
| 5.33         | 1.22        | 45        | NRS                                                     | 10         | No           | 1.379999995  |
| 4.96         | 1.27        | 45        | NRS                                                     | 10         | No           | 2.690000057  |
| 2.9          | 0.788761976 | 13        | 0-5                                                     | 5          | No           | 1.879999995  |
| 3.086875     | 0.712821356 | 16        | 0-5                                                     | 5          | No           | 1.809999943  |
| 2.75         | 1.11        | 8         | 0-5                                                     | 5          | No           | 2.890000105  |
| 2.72         | 0.77        | 9         | 0-5                                                     | 5          | No           | 3.069999933  |

| control_meanadj | samplesize | STsmd        | STse        | LTsmd        | LTse        | SMD_pain_ST  | seSMD_pain_ST | SMD_pain_LT  | seSMD_pain_LT |
|-----------------|------------|--------------|-------------|--------------|-------------|--------------|---------------|--------------|---------------|
| 4.300000191     | 29         |              |             | -0.452412486 | 0.39550209  |              |               | -0.452412486 | 0.39550209    |
| 3.200000048     | 32         | -0.235682875 | 0.373435289 |              |             | -0.235682875 | 0.373435289   |              |               |
| 4.179999828     | 76         | -0.056842905 | 0.229781657 |              |             | -0.056842905 | 0.229781657   |              |               |
| 3.200000048     | 51         | -0.850733757 | 0.295503795 |              |             | -0.850733757 | 0.295503795   |              |               |
| 3.349999905     | 50         | -0.082478531 | 0.283877015 |              |             | -0.082478531 | 0.283877015   |              |               |
| 35.29999924     | 223        | -0.241823435 | 0.134435013 |              |             | -0.241823435 | 0.134435013   |              |               |
| 36.40000153     | 196        |              |             | -0.318566978 | 0.143888071 |              |               | -0.318566978 | 0.143888071   |
| 2.980000019     | 192        |              |             | -0.117581427 | 0.144471377 |              |               | -0.117581427 | 0.144471377   |
| 4.059999943     | 213        | -0.17535539  | 0.137316912 |              |             | -0.17535539  | 0.137316912   |              |               |
| 53.34999847     | 102        | -0.697276056 | 0.204112068 |              |             | -0.697276056 | 0.204112068   |              |               |
| 22.13999939     | 45         | -0.520455956 | 0.304031938 |              |             | -0.520455956 | 0.304031938   |              |               |
| 48.06000137     | 39         | -0.148678482 | 0.321672708 |              |             | -0.148678482 | 0.321672708   |              |               |
| 2               | 42         |              |             | 0.375764936  | 0.311453193 |              |               | 0.375764936  | 0.311453193   |
| 2               | 42         | 0.061091501  | 0.308682263 |              |             | 0.061091501  | 0.308682263   |              |               |
| 4.199999809     | 60         | -0.232495174 | 0.259099692 |              |             | -0.232495174 | 0.259099692   |              |               |
| -1.200000048    | 363        | 0            | 0.105184123 |              |             | 0            | 0.105184123   |              |               |
| 45.11999893     | 107        | -0.023019647 | 0.193565264 |              |             | -0.023019647 | 0.193565264   |              |               |
| 97.69000244     | 156        |              |             | 0.15069221   | 0.170895815 |              |               | 0.15069221   | 0.170895815   |
| 42              | 212        |              |             | -0.124223821 | 0.146705493 |              |               | -0.124223821 | 0.146705493   |
| 3.799999952     | 94         |              |             | -0.73304522  | 0.213972121 |              |               | -0.73304522  | 0.213972121   |
| 3.799999952     | 94         | -1.170521259 | 0.22429882  |              |             | -1.170521259 | 0.22429882    |              |               |
| 1.980000019     | 47         |              |             | -0.011795647 | 0.292328745 |              |               | -0.011795647 | 0.292328745   |
| 2.910000086     | 51         | 0.06975691   | 0.280198485 |              |             | 0.06975691   | 0.280198485   |              |               |
| 6.400000095     | 184        |              |             | -0.034960978 | 0.160227969 |              |               | -0.034960978 | 0.160227969   |
| 52.90000153     | 543        | -0.267012119 | 0.090453058 |              |             | -0.267012119 | 0.090453058   |              |               |
| 51              | 587        |              |             | -0.256311804 | 0.087950982 |              |               | -0.256311804 | 0.087950982   |
| 5.329999924     | 90         |              |             | -3.442404509 | 0.33432743  |              |               | -3.442404509 | 0.33432743    |
| 4.960000038     | 90         | -2.008849621 | 0.259563655 |              |             | -2.008849621 | 0.259563655   |              |               |
| 2.900000095     | 19         |              |             | -1.358881831 | 0.545802474 |              |               | -1.358881831 | 0.545802474   |
| 3.086874962     | 23         | -1.728356242 | 0.525814891 |              |             | -1.728356242 | 0.525814891   |              |               |
| 2.75            | 17         |              |             | 0.157171264  | 0.486759216 |              |               | 0.157171264  | 0.486759216   |
| 2.720000029     | 18         | 0.448680967  | 0.478030652 |              |             | 0.448680967  | 0.478030652   |              |               |

| _ES          | _seES       | _LCI         | _UCI         | _WT         |
|--------------|-------------|--------------|--------------|-------------|
| -0.452412486 | 0.39550209  | -1.227582335 | 0.322757334  | 6.276983738 |
|              |             |              |              | 0           |
|              |             |              |              | 0           |
|              |             |              |              | 0           |
|              |             |              |              | 0           |
|              |             |              |              | 0           |
| -0.318566978 | 0.143888071 | -0.600582421 | -0.036551528 | 8.95059967  |
| -0.117581427 | 0.144471377 | -0.400740117 | 0.165577248  | 8.945877075 |
|              |             |              |              | 0           |
|              |             |              |              | 0           |
|              |             |              |              | 0           |
|              |             |              |              | 0           |
| 0.375764936  | 0.311453193 | -0.234672084 | 0.986201942  | 7.221377373 |
|              |             |              |              | 0           |
|              |             |              |              | 0           |
|              |             |              |              | 0           |
|              |             |              |              | 0           |
| 0.15069221   | 0.170895815 | -0.184257433 | 0.485641867  | 8.717989922 |
| -0.124223821 | 0.146705493 | -0.411761314 | 0.163313672  | 8.927659988 |
| -0.73304522  | 0.213972121 | -1.152422905 | -0.313667566 | 8.297485352 |
|              |             |              |              | 0           |
| -0.011795647 | 0.292328745 | -0.58474946  | 0.56115818   | 7.438874722 |
|              |             |              |              | 0           |
| -0.034960978 | 0.160227969 | -0.349002004 | 0.279080063  | 8.813154221 |
|              |             |              |              | 0           |
| -0.256311804 | 0.087950982 | -0.428692579 | -0.083931044 | 9.330347061 |
| -3.442404509 | 0.33432743  | -4.09767437  | -2.787134886 | 6.961012363 |
|              |             |              |              | 0           |
| -1.358881831 | 0.545802474 | -2.42863512  | -0.289128661 | 4.786525726 |
|              |             |              |              | 0           |
| 0.157171264  | 0.486759216 | -0.796859264 | 1.111201763  | 5.332112789 |
|              |             |              |              | 0           |
