# Supplementary material for: The Effectiveness of Cognitive Behavioural Treatment for Non-Specific Low Back Pain: A Systematic Review and Meta-Analysis
Source: PubMed Central journal article supplement (PMC4526658; doi:10.1371/journal.pone.0134192), 2015-08-05
Supplement: pone.0134192.s003.pdf [file pone.0134192.s003.pdf]

| trialid         | riskofbias        | LBP_duration | assessmentpoint_weeks | timeperiod | cb_code      | cb_mean | cb_sd       | cb_n | control_code |
|-----------------|-------------------|--------------|-----------------------|------------|--------------|---------|-------------|------|--------------|
| Johnson 2007    | High risk of bias | >=6 weeks    | 65 weeks              | LT         | CB alone     | 0.75    | 0.23        | 89   | WL/UC        |
| Johnson 2007    | High risk of bias | >=6 weeks    | 12 weeks              | ST         | CB alone     | 0.75    | 0.18        | 98   | WL/UC        |
| Moore 2000      | High risk of bias | >=6 weeks    | 12 weeks              | ST         | CB alone     | 75.6    | 17.9        | 108  | WL/UC        |
| Moore 2000      | High risk of bias | >=6 weeks    | 52 weeks              | LT         | CB alone     | 75.5    | 18          | 97   | WL/UC        |
| Schweikert 2006 | High risk of bias | >=6 weeks    | 29 weeks              | LT         | CB + Control | 70      | 17.7        | 105  | GAT          |
| Schweikert 2006 | High risk of bias | >=6 weeks    | 3 weeks               | ST         | CB + Control | 70.3    | 19.3        | 158  | GAT          |
| Critchley 2007  | Low risk of bias  | >=6 weeks    | 52 weeks              | LT         | CB alone     | 0.72    | 0.381426606 | 69   | GAT          |
| Hill 2011       | Low risk of bias  | >=6 weeks    | 52 weeks              | LT         | CB + Control | -8.6    | 12.2        | 128  | GAT          |
| Lamb 2012       | Low risk of bias  | >=6 weeks    | 52 weeks              | LT         | CB + Control | 46.4    | 11.51       | 375  | GAT          |
| Lamb 2012       | Low risk of bias  | >=6 weeks    | 12 weeks              | ST         | CB + Control | 47      | 11.44       | 332  | GAT          |
| Monticone 2013  | High risk of bias | >=6 weeks    | 57 weeks              | LT         | CB + Control | 85      | 13.81       | 45   | GAT          |
| Monticone 2013  | High risk of bias | >=6 weeks    | 5 weeks               | ST         | CB + Control | 73.22   | 18.19       | 45   | GAT          |

| control_mean | control_sd  | control_n | measure                      | measuremax | higherisgood | cb_meanadj   | control_meanadj | samplesize |
|--------------|-------------|-----------|------------------------------|------------|--------------|--------------|-----------------|------------|
| 0.71         | 0.23        | 81        | EQ-5D                        | 1          | Yes          | 0.25         | 0.289999992     | 170        |
| 0.7          | 0.25        | 87        | EQ-5D                        | 1          | Yes          | 0.25         | 0.300000012     | 185        |
| 73.2         | 17.9        | 105       | SF-36 mental health subscale | 100        | Yes          | 24.39999962  | 26.79999924     | 213        |
| 73.4         | 20.2        | 95        | SF-36 mental health subscale | 100        | Yes          | 24.5         | 26.60000038     | 192        |
| 63.8         | 19.9        | 133       | EuroQoL                      | 100        | Yes          | 30           | 36.20000076     | 238        |
| 68.6         | 19.5        | 184       | EuroQoL                      | 100        | Yes          | 29.70000076  | 31.39999962     | 342        |
| 0.664615385  | 0.296910691 | 143       | EQ-5D                        | 1          | Yes          | 0.280000001  | 0.335384607     | 212        |
| -6.8         | 13.1        | 56        | SF-12 physical               | 100        | No           | -8.600000381 | -6.800000191    | 184        |
| 47           | 11.35       | 187       | SF-12 physical               | 100        | Yes          | 53.59999847  | 53              | 562        |
| 46.4         | 11.25       | 176       | SF-12 physical               | 100        | Yes          | 53           | 53.59999847     | 508        |
| 56.44        | 15.9        | 45        | SF-36                        | 100        | Yes          | 15           | 43.56000137     | 90         |
| 44.22        | 16.51       | 45        | SF-36                        | 100        | Yes          | 26.78000069  | 55.77999878     | 90         |

| SMD_health_ST | seSMD_health_ST | SMD_health_LT | seSMD_health_LT | _ES          | _seES       | _LCI         | _UCI         | _WT         |
|---------------|-----------------|---------------|-----------------|--------------|-------------|--------------|--------------|-------------|
|               |                 | -0.173913002  | 0.15385595      | -0.173913002 | 0.15385595  | -0.475465119 | 0.1276391    | 14.36689472 |
| -0.231756508  | 0.147800833     |               |                 |              |             |              |              | 0           |
| -0.13407819   | 0.137206659     |               |                 |              |             |              |              | 0           |
|               |                 | -0.10983216   | 0.144455314     | -0.10983216  | 0.144455314 | -0.392959386 | 0.173295066  | 14.58851528 |
|               |                 | -0.326969922  | 0.131411985     | -0.326969922 | 0.131411985 | -0.584532678 | -0.069407165 | 14.88309383 |
| -0.087593123  | 0.108513497     |               |                 |              |             |              |              | 0           |
|               |                 | -0.169537604  | 0.146813482     | -0.169537604 | 0.146813482 | -0.457286745 | 0.118211515  | 14.53360367 |
|               |                 | -0.144244373  | 0.160395771     | -0.144244373 | 0.160395771 | -0.45861432  | 0.170125559  | 14.20870781 |
|               |                 | 0.052369118   | 0.089536078     | 0.052369118  | 0.089536078 | -0.123118371 | 0.227856606  | 15.69818497 |
| -0.052748755  | 0.093255647     |               |                 |              |             |              |              | 0           |
|               |                 | -1.917845607  | 0.255622625     | -1.917845607 | 0.255622625 | -2.418856621 | -1.416834474 | 11.72099686 |
| -1.66951406   | 0.245522395     |               |                 |              |             |              |              | 0           |
